# Supplementary material
Source: ML conference proceedings conference paper supplement (https://proceedings.neurips.cc/paper_files/paper/2008/hash/42e77b63637ab381e8be5f8318cc28a2-Abstract.html)
Supplement: Supplementary file [file 42e77b63637ab381e8be5f8318cc28a2-Supplemental.zip]

---

# Particle Filter-based Policy Gradient in POMDPs

## Supplementary material

---

### 1 Proof of Proposition 1

**Proposition 1** (Bias-variance trade-off). *Assume that  $J(\theta)$  is three times continuously differentiable in a small neighborhood of  $\theta$ , then the asymptotic (when  $N \rightarrow \infty$ ) bias of the naive FD estimate  $I_h^{N,M}$  is of order  $O(h^2)$  and its variance is  $O(N^{-1}M^{-1}h^{-2})$ .*

*Proof.* Thanks to the consistency property of PFs,  $\mathbb{E}[\lim_{N \rightarrow \infty} I_h^{N,M}] = \frac{J(\theta+h) - J(\theta-h)}{2h}$ , and using a three-order Taylor expansions of  $J$ , we have  $\frac{J(\theta+h) - J(\theta-h)}{2h} = \partial J(\theta) + \frac{\partial^3 J(\theta)}{\partial \theta^3} \frac{h^2}{6} + o(h^2)$ . We deduce the asymptotic bias of the naive FD gradient estimate:  $\mathbb{E}[\lim_{N \rightarrow \infty} I_h^{N,M}] - \partial J(\theta) = O(h^2)$ .

Now, since the two stochastic estimators  $J_{\omega_m}^N(\theta + h)$  and  $J_{\omega_{m'}}^N(\theta - h)$  are independent, the variance of  $I_h^{N,M}$  is  $\frac{1}{4Mh^2} (\text{Var}[J_{\omega_m}^N(\theta + h)] + \text{Var}[J_{\omega_{m'}}^N(\theta - h)])$ . Now, an IPS satisfies a Central Limit Theorem (see e.g. (Del Moral, 2004; Douc & Moulines, 2008) for details), thus  $\text{Var}[J_{\omega}^N(\theta)] \sim_{N \rightarrow \infty} \sigma^2(\theta)/N$ , where  $\sigma^2(\theta)$  is the asymptotic variance. We deduce that  $\text{Var}[I_h^{N,M}] \sim_{(N,M,h) \rightarrow (\infty, \infty, 0)} \frac{\sigma^2(\theta)}{2NMh^2}$ .  $\square$

### 2 Proof of Proposition 2

**Proposition 2.** *Under weak conditions on  $f$  (see (Moral & Miclo, 2000) for general assumptions or (Douc & Moulines, 2008) for refined assumptions), there exists a neighborhood of  $\theta$ , such that for any  $\theta'$  in this neighborhood,  $b_{t,\theta'}^N(f)$  defined by (3) is a consistent estimator of  $b_{t,\theta'}(f)$ , i.e.  $\lim_{N \rightarrow \infty} b_{t,\theta'}^N(f) = b_{t,\theta'}(f)$  almost surely.*

*Proof.* For any  $\theta'$ , the belief feature is:

$$\begin{aligned}
 b_{t,\theta'}(f, Y_{1:t}(\theta')) &= \mathbb{E}[f(X_t(\theta')) | Y_{1:t}(\theta')] \\
 &= \frac{\mathbb{E}\left[f(X_t(\theta')) \prod_{s=1}^t g_s(\theta')\right]}{\mathbb{E}\left[\prod_{s=1}^t g_s(\theta')\right]} \\
 &= \frac{\mathbb{E}\left[f(X_t(\theta')) \frac{\prod_{s=1}^t g_s(\theta')}{\prod_{s=1}^t g_s(\theta)} \prod_{s=1}^t g_s(\theta)\right]}{\mathbb{E}\left[\frac{\prod_{s=1}^t g_s(\theta')}{\prod_{s=1}^t g_s(\theta)} \prod_{s=1}^t g_s(\theta)\right]} \\
 &= \frac{\mathbb{E}\left[f(X_t(\theta')) \frac{\prod_{s=1}^t g_s(\theta')}{\prod_{s=1}^t g_s(\theta)} \prod_{s=1}^t g_s(\theta)\right]}{\mathbb{E}\left[\prod_{s=1}^t g_s(\theta)\right]} \left( \frac{\mathbb{E}\left[\frac{\prod_{s=1}^t g_s(\theta')}{\prod_{s=1}^t g_s(\theta)} \prod_{s=1}^t g_s(\theta)\right]}{\mathbb{E}\left[\prod_{s=1}^t g_s(\theta)\right]} \right)^{-1},
 \end{aligned}$$

where we used the short notation  $g_s(\theta)$  to denote  $g(X_s(\theta), Y_s(\theta))$ . Now we use the general PF convergence properties for Feynman-Kac (FK) models (see (Moral & Miclo, 2000; Del Moral,

2004) or (Douc & Moulines, 2008)) which, applied to a FK flow with Markov chain  $X_{1:t}$ , (random) potential functions  $\phi(X_s)$ , and test function  $H(X_{1:t})$ , states that the PF estimate:  $\frac{1}{N} \sum_{i=1}^N H(x_{1:t}^i)$  is consistent with  $\frac{\mathbb{E}[H(X_{1:t}) \prod_{s=1}^t \phi(X_s)]}{\mathbb{E}[\prod_{s=1}^t \phi(X_s)]}$ .

Applying this result successively to the test function  $H \stackrel{\text{def}}{=} f(X_t(\theta')) \frac{\prod_{s=1}^t g(X_s(\theta'), Y_s(\theta'))}{\prod_{s=1}^t g(X_s(\theta), Y_s(\theta))}$  and to  $H \stackrel{\text{def}}{=} \frac{\prod_{s=1}^t g(X_s(\theta'), Y_s(\theta'))}{\prod_{s=1}^t g(X_s(\theta), Y_s(\theta))}$ , with the potential  $\phi(X_s) \stackrel{\text{def}}{=} g(X_s(\theta), Y_s(\theta))$ , we deduce that the PF estimator:

$$\frac{\frac{1}{N} \sum_{i=1}^N f(x_t^i(\theta')) \frac{\prod_{s=1}^t g(x_s^i(\theta'), y_s(\theta'))}{\prod_{s=1}^t g(x_s^i(\theta), y_s(\theta))}}{\frac{1}{N} \sum_{i=1}^N \frac{\prod_{s=1}^t g(x_s^i(\theta'), y_s(\theta'))}{\prod_{s=1}^t g(x_s^i(\theta), y_s(\theta))}} = \sum_{i=1}^N \frac{l_t^i(\theta, \theta')}{\sum_{j=1}^N l_t^j(\theta, \theta')} f(x_t^i(\theta')) = b_{t, \theta'}^N(f)$$

is consistent with  $b_{t, \theta'}(f)$ . The denominator being the product of the likelihood ratios is bounded away from 0 since from the smoothness assumption on all necessary functions, the limit of  $\frac{\prod_{s=1}^t g(X_s(\theta'), Y_s(\theta'))}{\prod_{s=1}^t g(X_s(\theta), Y_s(\theta))}$  when  $\theta' \rightarrow \theta$  exists and equals 1. Thus, in a neighborhood of  $\theta$ , the PF estimator (3) is well defined and is a consistent estimator of  $b_{t, \theta'}(f)$ .  $\square$

## References

- Del Moral, P. (2004). *Feynman-kac formulae, genealogical and interacting particle systems with applications*. Springer.
- Douc, R., & Moulines, E. (2008). Limit theorems for weighted samples with applications to sequential monte carlo methods. *To appear in Annals of Statistics*.
- Moral, P. D., & Miclo, L. (2000). Branching and interacting particle systems. approximations of feynman-kac formulae with applications to non-linear filtering. *Séminaire de probabilités de Strasbourg*, 34, 1–145.
